# Supplementary material for: Impact of Fast Sodium Channel Inactivation on Spike Threshold Dynamics and Synaptic Integration
Source: PubMed Central journal article supplement (PMC3088652; doi:10.1371/journal.pcbi.1001129), 2011-05-05
Supplement: pcbi.1001129.s001.pdf [file pcbi.1001129.s001.pdf]

Supporting Information - Figure S1

## Impact of sodium channel inactivation on spike threshold dynamics and synaptic integration

Jonathan Platkiewicz<sup>1,2</sup> and Romain Brette<sup>1,2</sup> (romain.brette@ens.fr)

<sup>1</sup>Laboratoire Psychologie de la Perception, CNRS and Université Paris Descartes, Paris, France, and

<sup>2</sup>Département d'Etudes Cognitives, Ecole Normale Supérieure, Paris, France

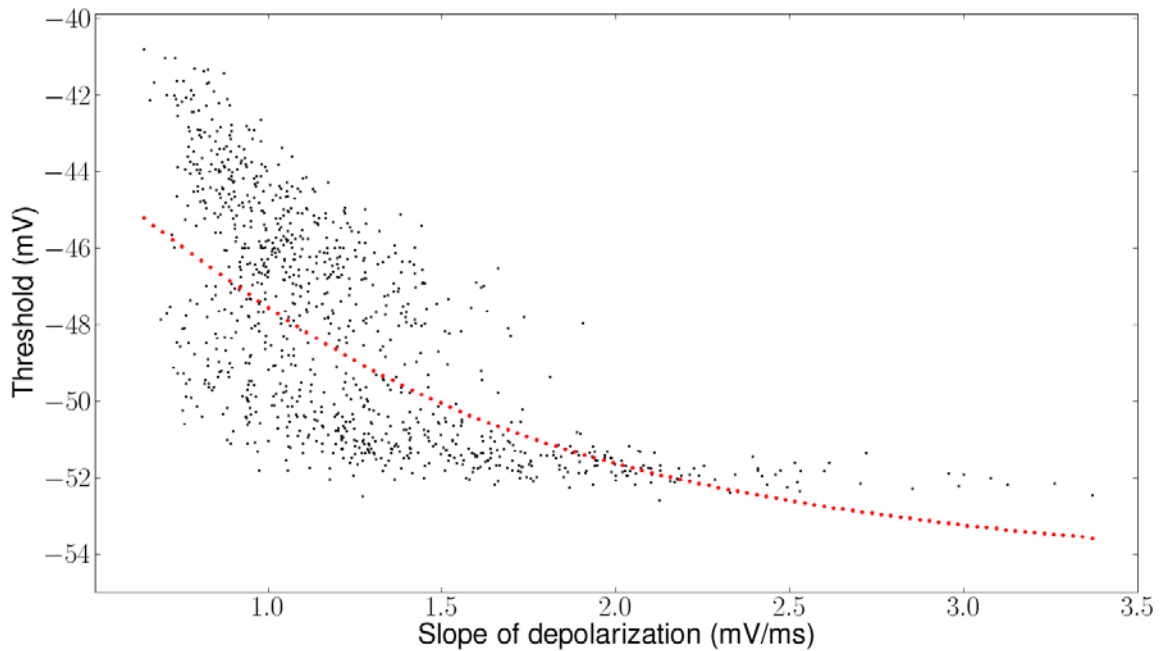

**Figure S1.** Slope-threshold relationship in the multicompartmental model of Hu et al. (2009), measured with linear regression over 5 ms (black dots), superimposed on the calculated relationship (red dashed line), using the Na channel properties of the model (as in Platkiewicz and Brette, 2010, Fig. 8H).

### References

Platkiewicz J, Brette R (2010) A threshold equation for action potential initiation. *PLoS Comput Biol* 6(7): e1000850. doi:10.1371/journal.pcbi.1000850.

Hu W, Tian C, Li T, Yang M, Hou H, et al. (2009) Distinct contributions of Na(v)1.6 and Na(v)1.2 in action potential initiation and backpropagation. *Nat Neurosci* 12: 996–1002
