# Supplementary material for: Impact of Fast Sodium Channel Inactivation on Spike Threshold Dynamics and Synaptic Integration
Source: PLOS journal article supplement (doi:10.1371/journal.pcbi.1001129), 2011-05-05
Supplement: S3 (10.1371/journal.pcbi.1001129.s003) [file journal.pcbi.1001129.s003]

301 Moved Permanently

# Moved Permanently

The document has moved here.

---

Apache Server at www.ploscompbiol.org Port 80
