# Supplementary material for: Impact of Fast Sodium Channel Inactivation on Spike Threshold Dynamics and Synaptic Integration
Source: PLoS Comput Biol. 2011 May 5;7(5):e1001129. doi: 10.1371/journal.pcbi.1001129 (PMC3088652; doi:10.1371/journal.pcbi.1001129)
Supplement: Table S1 — Properties of Na channels of central neurons in situ. (0.16 MB PDF) [file pcbi.1001129.s002.pdf]

# Impact of sodium channel inactivation on spike threshold dynamics and synaptic integration

Jonathan Platkiewicz<sup>1,2</sup> and Romain Brette<sup>1,2</sup> (romain.brette@ens.fr)

<sup>1</sup>Laboratoire Psychologie de la Perception, CNRS and Université Paris Descartes, Paris, France, and <sup>2</sup>Département d'Etudes Cognitives, Ecole Normale Supérieure, Paris, France

**Table S1** - Properties of Na channels of central neurons *in situ*.

| Reference                                   | Va (mV) | ka (mV) | Vi (mV) | ki (mV) | ka/ki | Area                            | Cellular type                        | Developmental stage | Recording site                     | Animal                                      |
|---------------------------------------------|---------|---------|---------|---------|-------|---------------------------------|--------------------------------------|---------------------|------------------------------------|---------------------------------------------|
| Huguenard et al. (1988) <sup>1</sup>        | -30,6   | 5,1     | -65     | 6,2     | 0,82  | neocortex                       | pyramidal                            | mature              | soma                               | rat                                         |
|                                             | -39,4   | 5,4     | -62,6   | 5,9     | 0,92  |                                 |                                      | young               |                                    |                                             |
|                                             | -30,4   | 5,6     | -68,4   | 5,7     | 0,98  |                                 |                                      | immature            |                                    |                                             |
|                                             | -34,1   | 5,4     | -62     | 5,9     | 0,92  |                                 | putative interneuron                 | mature              |                                    |                                             |
|                                             | -35,2   | 5,6     | -66,4   | 5,6     | 1,00  |                                 |                                      | young               |                                    |                                             |
|                                             | -26     | 5,5     | -64,4   | 5,5     | 1,00  |                                 |                                      | immature            |                                    |                                             |
| Martina and Jonas (1997) <sup>2</sup>       | -8,82   | 9       | -58,3   | 6,7     | 1,34  | hippocampus - CA1               | basket                               | P9 - 16             | soma                               | rat                                         |
|                                             | -7,2    | 9,3     | -62,9   | 10,7    | 0,87  |                                 | pyramidal                            |                     |                                    |                                             |
| Colbert and Pan (2002) <sup>3</sup>         | -31,6   | 6,8     | -66     | 5,3     | 1,28  | neocortex - layer 5             | pyramidal                            | P14 - 24            | soma                               | rat                                         |
|                                             | -38,4   | 6       | -69     | 5,3     | 1,13  |                                 |                                      |                     | soma                               |                                             |
|                                             | -30,1   | 8,1     | -66     | 5,9     | 1,37  |                                 |                                      |                     | axon initial segment               |                                             |
| Baranauskas and Martina (2006) <sup>4</sup> | -33,8   | 6,4     | -72     | 6,8     | 0,94  | prefrontal cortex               | pyramidal                            | 4 - 7 weeks old     | soma                               | rat                                         |
| Mercer et al. (2007) <sup>5</sup>           | -28,5   | 5,7     | -53,7   | 5       | 1,14  | basal ganglia - globus pallidus |                                      | P16 - 22            |                                    | mice                                        |
| Kole et al. (2008) <sup>6</sup>             | -21,7   | 6,5     | -54,5   | 8,9     | 0,73  | somatosensory cortex            | pyramidal                            | 2 - 4 weeks         | soma                               | rat                                         |
|                                             | -31,1   | 6,5     | -60,8   | 6,9     | 0,94  |                                 |                                      |                     | axon initial segment               |                                             |
|                                             | -29,2   | 6,1     | -58,7   | 5,4     | 1,13  |                                 |                                      |                     | axon initial segment depolymerized |                                             |
| Royeck et al. (2008) <sup>7</sup>           | -29,8   | 5,9     | -50     | 4       | 1,48  | hippocampus - CA1               | pyramidal                            | P17 - 21            | soma                               | mice                                        |
|                                             | -25     | 5,4     | -50     | 4       | 1,35  |                                 |                                      |                     |                                    | mutant mice (deficient for Nav1.6 subunits) |
| Hu et al. (2009) <sup>8</sup>               | -29,7   | 5,8     | -67     | 7,1     | 0,82  | prefrontal cortex               | pyramidal                            | P16 - 20            | soma                               | rat                                         |
|                                             | -43,9   | 5,7     | -80     | 5,4     | 1,06  |                                 |                                      |                     | axon initial segment               |                                             |
| Kuba and Ohmori (2009) <sup>9</sup>         | -39,5   | 4,4     | -57,5   | 4,8     | 0,92  | nucleus magnocellularis         | high/middle-frequency auditory relay | P3 - 8              | soma                               | chick                                       |
|                                             | -38,6   | 4,1     | -57,9   | 4,6     | 0,89  |                                 | low-frequency auditory relay         |                     |                                    |                                             |
| Scott et al. (2010) <sup>10</sup>           | -30,9   | 7,5     | -77,4   | 7,4     | 1,01  | medial superior olive           | principal                            | P16 - 19            | soma                               | mongolian gerbil                            |
| Mean                                        | -30,2   | 6,2     | -63,1   | 6       | 1,05  |                                 |                                      |                     |                                    |                                             |

## References

1. Huguenard, J.R., Hamill, O.P. & Prince, D.A. Developmental changes in Na<sup>+</sup> conductances in rat neocortical neurons: appearance of a slowly inactivating component. *J Neurophysiol* **59**, 778-795 (1988).
2. Martina, M. & Jonas, P. Functional differences in Na<sup>+</sup> channel gating between fast-spiking interneurons and principal neurons of rat hippocampus. *J Physiol* **505**, 593-603 (1997).
3. Colbert, C.M. & Pan, E. Ion channel properties underlying axonal action potential initiation in pyramidal neurons. *Nat Neurosci* **5**, 533-538 (2002).
4. Baranauskas, G. & Martina, M. Sodium currents activate without a Hodgkin-and-Huxley-type delay in central mammalian neurons. *J Neurosci* **26**, 671-684 (2006).
5. Mercer, J.N., Chan, C.S., Tkatch, T., Held, J. & Surmeier, D.J. Nav1.6 sodium channels are critical to pacemaking and fast spiking in globus pallidus neurons. *J Neurosci* **27**, 13552-13566 (2007).
6. Kole, M.H.P. et al. Action potential generation requires a high sodium channel density in the axon initial segment. *Nat Neurosci* **11**, 178-186 (2008).
7. Royeck, M. et al. Role of axonal Nav1.6 sodium channels in action potential initiation of CA1 pyramidal neurons. *J Neurophysiol* **100**, 2361-2380 (2008).
8. Hu, W. et al. Distinct contributions of Na(v)1.6 and Na(v)1.2 in action potential initiation and backpropagation. *Nat Neurosci* **12**, 996-1002 (2009).
9. Kuba, H. & Ohmori, H. Roles of axonal sodium channels in precise auditory time coding at nucleus magnocellularis of the chick. *J Physiol* **587**, 87-100 (2009).
10. Scott, L.L., Mathews, P.J. & Golding, N.L. Perisomatic voltage-gated sodium channels actively maintain linear synaptic integration in principal neurons of the medial superior olive. *J. Neurosci* **30**, 2039-2050 (2010).
